# Supplementary material for: Why do parents use the emergency department for minor injury and illness? A cross-sectional questionnaire
Source: PubMed Central journal article supplement — JRSM Open. 2016 Feb 12;7(3):2054270415623695. doi: 10.1177/2054270415623695 (PMC4780204; doi:10.1177/2054270415623695), 2016-02-12
Supplement: Supplementary_File_2.pdf [file Supplementary_File_2.pdf]

Supplementary file 2

**Table 3: Comparing child age group with UPED questionnaire variables (test statistics reported for the Kruskal-Wallis Test or ANOVA and appropriate post hoc analyses as outlined under 'data analysis')**

|                              | Comparing child age group with UPED questionnaire variables: |            |          | Age groups with significant differences (mean, SD) or (median, IR):                                                              |
|------------------------------|--------------------------------------------------------------|------------|----------|----------------------------------------------------------------------------------------------------------------------------------|
| <b>Variables:</b>            | <b>Test statistic</b>                                        | <b>d f</b> | <b>p</b> |                                                                                                                                  |
|                              |                                                              |            |          | For all variables a lower score (mean/median) indicated a more 'negative' response e.g. greater perceived seriousness            |
| <b>Perceived seriousness</b> | F=4.003                                                      | 4          | 0.003    | <1 year (4.41,1.62) vs.<br>1-4 (5.66,1.90) (p=0.036)<br>5-9 (6.06,1.86) (p=0.003)<br>10-14 (5.99,1.81) (p=0.003)                 |
| <b>Level of worry</b>        | X <sup>2</sup> =18.175                                       | 4          | 0.001    | < 1 year (6,7) vs.<br>10-14 (8,5) (p=0.001)<br>15-18 (8,4) (p=0.033)<br>1-4 vs. 10-14 (p=0.009)<br>5-9 (6,4) vs. 10-14 (p=0.002) |
| <b>Level of stress</b>       | X <sup>2</sup> =35.082                                       | 4          | p≤0.0005 | <1 year (7,3) vs.<br>1-4 (8,5) (p=0.035)<br>5-9 (9,5) (p=0.028)                                                                  |

|                                                                           |                |   |                 |                                                                                                                                                                                                                                                  |
|---------------------------------------------------------------------------|----------------|---|-----------------|--------------------------------------------------------------------------------------------------------------------------------------------------------------------------------------------------------------------------------------------------|
|                                                                           |                |   |                 | 10-14 (10,2) ( $p \leq 0.0005$ )<br>15-18 (10,3) ( $p = 0.001$ )<br>1-4 vs. 10-14 ( $p \leq 0.0005$ )<br>5-9 vs. 10-14 ( $p = 0.001$ )                                                                                                           |
| <b>Perceived helplessness</b>                                             | $X^2 = 23.833$ | 4 | $p \leq 0.0005$ | <1 year (6,6) vs.<br>5-9 (10,3) ( $p = 0.033$ )<br>10-14 (10,2) ( $p \leq 0.0005$ )<br>15-18 (10,1) ( $p = 0.007$ )<br>1-4 (9,3) vs. 10-14 ( $p \leq 0.0005$ )<br>5-9 vs. 10-14 ( $p = 0.014$ )                                                  |
| <b>Level of upset</b>                                                     | $X^2 = 32.650$ | 4 | $p \leq 0.0005$ | <1 year (6,5) vs.<br>10-14 (10,3) ( $p \leq 0.0005$ )<br>15-18 (8,4) ( $p = 0.011$ )<br>1-4 (7,5) vs. 10-14<br>( $p \leq 0.0005$ )<br>5-9 (7,4) vs. 10-14<br>( $p \leq 0.0005$ )                                                                 |
| <b>Level of confidence in looking after the child with illness/injury</b> | $X^2 = 19.876$ | 4 | 0.001           | <1 year (8,5) (lower levels of confidence) vs.<br>1-4 (10,2) ( $p = 0.007$ )<br>5-9 (10,2) ( $p = 0.012$ )<br>10-14 (10,0) ( $p \leq 0.0005$ )<br>15-18 (10,2) ( $p = 0.010$ )<br>1-4 vs. 10-14 ( $p = 0.014$ )<br>5-9 vs. 10-14 ( $p = 0.031$ ) |

|                                                                             |              |   |       |                                                                                                                                                                                   |
|-----------------------------------------------------------------------------|--------------|---|-------|-----------------------------------------------------------------------------------------------------------------------------------------------------------------------------------|
| <b>Level of confidence in looking after a child who is unwell generally</b> | $X^2=12.424$ | 4 | 0.014 | <1 year olds (8,4) (lower levels of confidence) vs.<br>1-4 (9,2) (p=0.045)<br>5-9 (10,2) (p=0.030)<br>10-14 (10,2) (p=0.001)<br>15-18 (10,2) (p=0.014)<br>1-4 vs. 10-14 (p=0.047) |
|-----------------------------------------------------------------------------|--------------|---|-------|-----------------------------------------------------------------------------------------------------------------------------------------------------------------------------------|
