# Supplementary material for: Why do parents use the emergency department for minor injury and illness? A cross-sectional questionnaire
Source: PubMed Central journal article supplement — JRSM Open. 2016 Feb 12;7(3):2054270415623695. doi: 10.1177/2054270415623695 (PMC4780204; doi:10.1177/2054270415623695), 2016-02-12
Supplement: Supplementary_File_3.pdf [file Supplementary_File_3.pdf]

### Supplementary file 3

**Table 4: Influencing factors in decision to use ED (range of number of contributory reasons given=1-9; ordered by main influence proportions)**

| <b>Reason for attendance</b>                                    | <b>Influencing factor<br/>frequency (%)<br/>[n=325;<br/>missing=12]</b> | <b>Main influence<br/>frequency (%)<br/>[n=300;<br/>missing=37]</b> |
|-----------------------------------------------------------------|-------------------------------------------------------------------------|---------------------------------------------------------------------|
| <b>1. I was advised to come here by someone other than a GP</b> | 96 (28.5)                                                               | 63 (18.7)                                                           |
| Minor Injury Unit                                               | 27                                                                      | 24                                                                  |
| NHS Direct                                                      | 21                                                                      | 13                                                                  |
| School                                                          | 18                                                                      | 11                                                                  |
| Paramedic                                                       | 5                                                                       | 5                                                                   |
| GP receptionist                                                 | 5                                                                       | 2                                                                   |
| First aider                                                     | 3                                                                       | 2                                                                   |
| Family/friend                                                   | 5                                                                       | 1                                                                   |
| Sports club                                                     | 2                                                                       | -                                                                   |
| Other                                                           | 8                                                                       | 3                                                                   |
| Missing                                                         | 2                                                                       | 2                                                                   |
| <b>2. The child needed to be seen quickly</b>                   | 104 (30.9)                                                              | 50 (14.8)                                                           |
| <b>3. The child's problem is more appropriate for here</b>      | 118 (35.0)                                                              | 38 (11.3)                                                           |

|                                                                                             |           |          |
|---------------------------------------------------------------------------------------------|-----------|----------|
| <b>4. The child was not getting any better</b>                                              | 50 (14.8) | 25 (7.4) |
| <b>5. Other influences (grouped together) (data available from authors)</b>                 | 41 (12.2) | 24 (7.1) |
| <b>6. For reassurance</b>                                                                   | 93 (27.8) | 21 (6.2) |
| <b>7. I was advised to come here by a GP (within normal hours 8.00am-6.00pm)</b>            | 31 (9.2)  | 16 (4.7) |
| <b>8. I did not contact the GP as I knew he/she would advise me to come to ED</b>           | 45 (13.4) | 15 (4.5) |
| <b>9. I wanted a second opinion on the child's problem</b>                                  | 45 (13.4) | 13 (3.9) |
| <b>10. You get all the tests and treatments in one place</b>                                | 61 (18.1) | 12 (3.6) |
| <b>11. I was advised to come here by an out-of-hours GP service (outside 8.00am-6.00pm)</b> | 10        | 5        |
| <b>12. Emergency department doctors are more experienced</b>                                | 21 (6.2)  | 5        |
| <b>13. I was unable to contact a GP / get a GP appointment</b>                              | 13 (3.9)  | 4        |
| <b>14. I prefer to use the Emergency Department than elsewhere</b>                          | 20 (5.9)  | 4        |

|                                                                       |          |   |
|-----------------------------------------------------------------------|----------|---|
| <b>15. You get better treatment here</b>                              | 26 (7.7) | 4 |
| <b>16. The child has already been seen here with the same problem</b> | 5        | 1 |
| <b>17. It is easier to come here because of my working hours</b>      | 3        | - |
| <b>18. It is easier because of childcare arrangements</b>             | 1        | - |
